# Supplementary material
Source: PubMed Central journal article supplement (PMC4038161)
Supplement: NIHMS503136-supplement-Supplemental_data.pdf [file NIHMS503136-supplement-Supplemental_data.pdf]

## Supplement Legends

Table 1. List of proteins found in prostatic fluid from 4 patients with prostate cancer. Listed proteins are the subset of proteins found in all 4 samples.

| Protein name                                      | Protein abbreviation |
|---------------------------------------------------|----------------------|
| 6-phosphogluconate dehydrogenase, decarboxylating | 6PGD_HUMAN           |
| Acid ceramidase precursor                         | ASAH1_HUMAN          |
| Adenyllyl cyclase-associated protein 1            | CAP1_HUMAN           |
| Afamin precursor                                  | AFAM_HUMAN           |
| Alpha-1-acid glycoprotein 1                       | A1AG1_HUMAN          |
| Alpha-1-antichymotrypsin                          | AACT_HUMAN           |
| Alpha-1-antitrypsin                               | A1AT_HUMAN           |
| Alpha-1B-glycoprotein precursor                   | A1BG_HUMAN           |
| Alpha-2-macroglobulin                             | A2MG_HUMAN           |
| Alpha-actinin-1                                   | ACTN1_HUMAN (+2)     |
| Alpha-enolase                                     | ENO4_HUMAN (+1)      |
| Aminopeptidase N                                  | AMPN_HUMAN           |
| Annexin A1                                        | ANXA1_HUMAN (+2)     |
| Annexin A3                                        | ANXA3_HUMAN          |
| Annexin A4                                        | ANXA4_HUMAN          |
| Annexin A5                                        | ANXA5_HUMAN (+1)     |
| Anthrithrombin-III precursor                      | ANT3_HUMAN           |
| Apolipoprotein A-1                                | APOA1_HUMAN          |
| Apolipoprotein B-100 precursor                    | APOB_HUMAN           |
| Aspartate aminotransferase, mitochondrial         | AATM_HUMAN (+3)      |
| ATP synthase B chain, mitochondrial               | AT5F1_HUMAN (+1)     |
| Carbonic anhydrase 1                              | CAH1_HUMAN           |
| Carbonic anhydrase 2                              | CAH2_HUMAN           |
| Carbonyl reductase [NADPH] 1                      | CBR1_HUMAN (+1)      |
| Carboxypeptidase E                                | CBPE_HUMAN           |
| Ceruloplasmin                                     | CERU_HUMAN           |
| Chloride intracellular channel protein 1          | CLIC1_HUMAN          |
| Clusterin precursor                               | CLUS_HUMAN           |
| Complement C3                                     | C3_HUMAN             |
| Complement factor B                               | CFAB_HUMAN           |
| Creatine kinase B-type                            | KCB_HUMAN            |
| Dipeptidyl peptidase 4                            | DP4_HUMAN            |
| Endoplasmic                                       | ENPL_HUMAN (+2)      |
| Ezrin                                             | EZR1_HUMAN (+1)      |
| Fatty acid synthase                               | FAS_HUMAN            |
| Fibrinogen alpha chain                            | FIBA_HUMAN           |
| Fibrinogen beta chain                             | FIBB_HUMAN           |
| Fibrinogen gamma chain                            | FIBG_HUMAN           |
| Flavin reductase                                  | BLVRB_HUMAN          |
| Fructose-bisphosphate aldolase A                  | ALDOA_HUMAN (+1)     |
| Galectin-3-binding protein                        | LG3BP_HUMAN          |
| Gelsolin precursor                                | GELS_HUMAN           |
| Glutathione S-transferase P                       | GSTP1_HUMAN          |
| Glyceroldehyde-3-phosphate dehydrogenase          | G3P_HUMAN (+1)       |
| Hemoglobin subunit alpha                          | HBA_HUMAN (+2)       |
| Hemoglobin subunit beta                           | HBB_HUMAN (+2)       |
| Hemopexin precursor                               | HEMO_HUMAN           |
| Hornerin                                          | HORN_HUMAN           |
| Hydroxyacyl-coenzyme A dehydrogenase, mitochondri | HCDH_HUMAN           |
| Ig gamma-1 chain C region                         | IGHG1_HUMAN          |
| Ig kappa chain C region                           | KAC_HUMAN            |
| Ig lambda chain C regions                         | LAC_HUMAN            |
| Ig mu chain C region                              | MUC_HUMAN            |
| Inter-alpha-trypsin inhibitor heavy chain H4      | ITIH4_HUMAN          |
| Iso citrate dehydrogenase                         | IDHC_HUMAN           |
| Keratin, type I cytoskeletal 10                   | K1C10_HUMAN          |
| Keratin, type I cytoskeletal 14                   | K1C14_HUMAN          |
| Keratin, type I cytoskeletal 9                    | K1C9_HUMAN           |
| Keratin, type II cytoskeletal 1                   | K2C1_HUMAN           |
| Keratin, type II cytoskeletal 2 epidermal         | K2C2_HUMAN           |
| Lactotransferrin precursor                        | TRFL_HUMAN           |
| Lactylglutathione lyase                           | LGUL_HUMAN (+1)      |
| L-lactate dehydrogenase A chain                   | LDHA_HUMAN (+2)      |
| L-xylulose reductase                              | DCXR_HUMAN           |
| Malate dehydrogenase, cytoplasmic                 | MDHC_HUMAN           |
| Myosin-7                                          | MYH7_HUMAN           |
| Myosin-9                                          | MYH9_HUMAN (+2)      |
| Nepsin                                            | NEP_HUMAN            |
| Peroxioredoxin-1                                  | PRDX1_HUMAN (+1)     |
| Peroxioredoxin-2                                  | PRDX2_HUMAN (+2)     |
| Peroxioredoxin-6                                  | PRDX6_HUMAN (+1)     |
| Phosphatidylethanolamine-binding protein 1        | PBP1_HUMAN           |
| Phosphoglycerate mutase 1                         | PGAM1_HUMAN (+3)     |
| Plasma protease C1 inhibitor                      | C1_HUMAN             |
| Plasma serine protease inhibitor                  | PSPI_HUMAN           |
| Plastin-2                                         | PLSL_HUMAN           |
| Programmed cell death 6-interacting protein       | PDC6I_HUMAN          |
| Prostate-specific antigen                         | KLK3_HUMAN           |
| Prostatic acid phosphatase                        | PPAP_HUMAN           |
| Proteasome subunit beta type-5                    | PSB5_HUMAN (+1)      |
| Protein-glutamine gamma-glutamyltransferase 4     | PGM4_HUMAN           |
| Pyruvate kinase isozymes M1/M2                    | KPFM_HUMAN           |
| Rab GDP dissociation inhibitor beta               | GDIB_HUMAN           |
| Ras-related protein Rab-3B                        | RAB3B_HUMAN          |
| Ras-related protein Rab-3D                        | RAB3D_HUMAN          |
| Rho GDP-dissociation inhibitor 1                  | GDIR_HUMAN           |
| Semenogelin-1                                     | SEMG1_HUMAN          |
| Serotransferrin                                   | TRFE_HUMAN (+1)      |
| Serpin B6                                         | SRSB_HUMAN (+1)      |
| Serum albumin                                     | ALBU_HUMAN (+1)      |
| Talin-1                                           | TLN1_HUMAN (+1)      |
| Triosephosphate isomerase                         | TPIS_HUMAN (+1)      |
| Ubiquitin-activating enzyme E1                    | UBE1_HUMAN           |
| Vinculin                                          | VINC_HUMAN (+2)      |
| Zinc-alpha-2-glycoprotein                         | ZAZG_HUMAN           |
